# Supplementary material
Source: publisher figshare collection journal article supplement (https://sage.figshare.com/ndownloader/files/18232349)
Supplement: Supplementary file 1 [file 18232349]

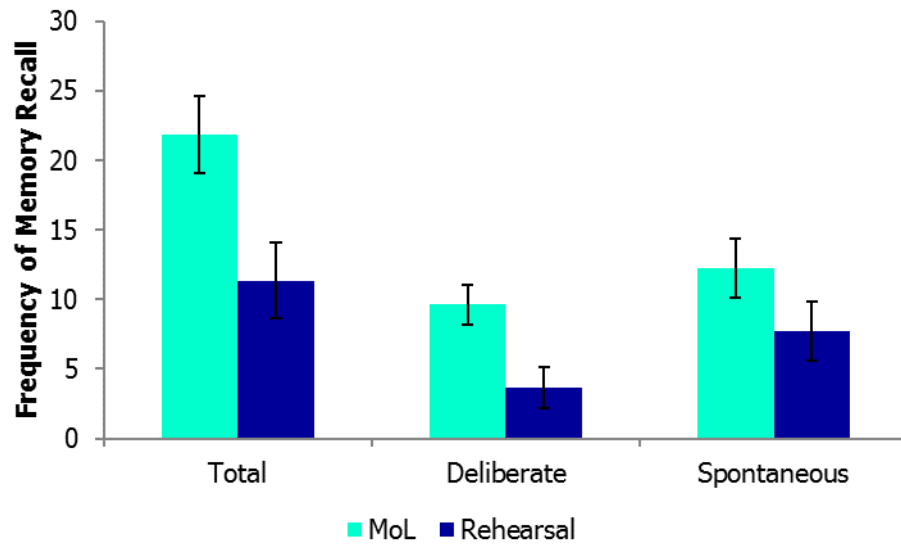

Supplementary Materials 2. Mean ( $\pm 1$  SEM) number of times that memories were recalled in the day-to-day over a four-week period (excluding homework), as recorded in participant diaries.
